## Physician Suicide: A Scoping Review to Highlight Opportunities for Prevention

1 **Tiffany I. Leung, MD, MPH, FACP, FAMIA<sup>1\*</sup>, Sima S. Pendharkar, MD, MPH, FACP<sup>2</sup>,**  
2 **Chwen-Yuen Angie Chen, MD, FACP, FASAM<sup>3</sup>, Rebecca Snyder, MSIS<sup>4</sup>**

3 <sup>1</sup>Faculty of Health, Medicine, and Life Sciences, Department of Internal Medicine, Maastricht  
4 University, Maastricht, The Netherlands

5 <sup>2</sup>The Brooklyn Hospital Center, Division of Hospital Medicine, Icahn School of Medicine at Mount  
6 Sinai, Brooklyn, NY, USA

7 <sup>3</sup>Department of Primary Care and Population Health, Stanford University, Palo Alto, CA, USA

8 <sup>4</sup>Library Services, University of Texas Southwestern Medical Center, Dallas, Texas, USA

9 **\* Correspondence:**

10 Corresponding Author

11 [t.leung@maastrichtuniversity.nl](mailto:t.leung@maastrichtuniversity.nl)

12 **Keywords:** Physician Suicide; Burnout, professional; Job satisfaction; Physicians; Suicide;  
13 Parasuicide

14 **Author Approval:** All authors have seen and approved the manuscript.

15 **Competing Interests:** The authors declare that the research was conducted in the absence of any  
16 commercial or financial relationships that could be construed as a potential conflict of interest.

17 **Declarations:** None

18 **Data Availability Statement:** The raw data supporting the conclusions of this manuscript will be  
19 made available by the authors, without undue reservation, to any qualified researcher.

20 **Funding Statement:** This work was supported by a Mapping the Landscape Literature Review grant  
21 (2017-2019) from the Arnold P. Gold Foundation Research Institute. The Arnold P Gold Foundation  
22 Research Institute had no role in the study design, data collection and analysis, writing of the report,  
23 or decision to submit the manuscript for publication.

## Physician Suicide: A Scoping Review to Highlight Opportunities for Prevention

### 24 Abstract

25 **Objective:** The aim of this scoping review is to map the current landscape of published research and  
26 perspectives on physician suicide. Findings could serve as a roadmap for further investigations and  
27 potentially inform efforts to prevent physician suicide.

28 **Methods:** Ovid MEDLINE, PsycInfo, and Scopus were searched for English-language publications  
29 from August 21, 2017 through April 28, 2018. Inclusion criteria were a primary outcome or thesis  
30 focused on suicide (including suicide completion, attempts, and thoughts or ideation) among medical  
31 students, postgraduate trainees, or attending physicians. Opinion articles were included. Studies that  
32 were non-English, or those that only mentioned physician burnout, mental health or substance use  
33 disorders were excluded. Data extraction was performed by two authors.

34 **Results:** The search yielded 1,596 articles, of which 347 articles passed to the full-text review round.  
35 The oldest article was an editorial from 1903; 210 (60.3%) articles were published from 2000 to  
36 present. Authors originated from 37 countries and 143 (41.2%) were opinion articles. Most discussed  
37 were suicide risk factors and culture of practice issues, while least discussed themes included public  
38 health and postvention.

39 **Conclusions:** Consistency and reliability of data and information about physician suicides could be  
40 improved. Data limitations partly contribute to these issues. Also, various suicide risk factors for  
41 physicians have been explored, and several remain poorly understood. Based on this scoping review,  
42 a public health approach, including surveillance and early warning systems, investigations of sentinel  
43 cases, and postvention may be impactful next steps in preventing physician deaths by suicide.

### 44 1 Introduction

45 Physician suicide is a significant problem for the medical community and general public and is  
46 poorly understood, suggesting that important knowledge and implementation gaps towards  
47 prevention remain. To address this gap, this literature review aims to describe the state of current  
48 knowledge and research on physician suicidal behaviors among medical students, postgraduate  
49 trainees, including residents and fellows, and physicians. Suicide is estimated to occur at a higher rate  
50 among physicians than the general population and perhaps even other professions (1,2), however,  
51 estimates by profession vary (3). Several medical organizations have begun launching various  
52 initiatives to address physician well-being, yet efforts to address physician suicide remain  
53 organization- or institution-specific. The aim of this scoping literature review is to map the current  
54 landscape of published research and perspectives on physician suicide. Findings could serve as a  
55 roadmap for informing further study, evidence-based policy, and interventions to prevent physician  
56 suicide.

### 57 2 Methods

58 This scoping review was conducted following the Arksey and O'Malley framework as expanded  
59 upon and outlined within the Joanna Briggs Institute Reviewers' Manual (4,5). A scoping review  
60 differs from other reviews such as a systematic review which gathers and assesses the quality of  
61 quantitative evidence to report on the effectiveness of a particular intervention in achieving a certain  
62 outcome (6). The research question was broadly designed to gather and analyze articles that mention  
63 physician suicide. No date range for the search was specified. The initial searches were performed on  
64 August 21, 2017 in Ovid MEDLINE, and October 11, 2017 in Ovid PsycINFO. Authors contributed  
65 seed articles that they had previously identified as relevant to physician suicide (2,7–10), which were

## Physician Suicide: A Scoping Review to Highlight Opportunities for Prevention

66 analyzed by the medical librarian co-author. Search terms and databases were then selected and  
67 tested based on this analysis. The search strategy also underwent a peer review process with two  
68 additional medical librarians. An updated search was run again on April 28, 2018 in Ovid  
69 MEDLINE, PsycINFO, and Scopus. Detailed search terms are available in Appendix 1.

70 Inclusion criteria were English-language papers with a primary outcome, measure, or thesis focused  
71 on death by suicide or suicidal behaviors among physicians, including suicide attempts, and suicidal  
72 thoughts and ideation. Physicians included medical students, postgraduate trainees (residents and  
73 fellows), and physicians at any career stage. Opinion articles were also included, if they otherwise  
74 met inclusion criteria; these included perspectives, letters to the editor or their replies, essays, and  
75 viewpoints with a focus specifically on physician suicide. Exclusion criteria were non-English  
76 publications and those only pertaining to physician burnout, mental health, substance use disorders,  
77 or other media, such as newspaper and magazine articles. Query results totaled 1,596 articles after  
78 deduplication. Two authors reviewed abstracts and titles to include in the the full-text review round  
79 and disagreements were adjudicated by a third author [initials deleted to maintain integrity of the  
80 review process]. Next, during the full-text review round, two authors again reviewed full-text articles  
81 for inclusion with a third author adjudicating disagreements. *Covidence*, a literature review  
82 management software, was used to review articles during inclusion and exclusion steps

83 Then, two authors performed data extraction (TL,SP) using a data charting table. Data extracted  
84 included: primary thesis or outcome measure (e.g. death by suicide, suicide attempt, suicidal ideation  
85 or thoughts), date of publication, authors' country affiliation, type of publication, study design,  
86 country of participants, tools used to ascertain outcome measures, and physician population  
87 (specialties, career stage). While reviewing articles, authors used an open coding approach to tag  
88 articles by key topics or themes (e.g. suicidal ideation, depression, prevention, substance use, etc.).  
89 The aim was to inductively identify key themes across the published literature included in this  
90 scoping review. During each subsequent round of review, tags could be added to articles. After all  
91 articles were reviewed and tagged by two authors (TL,SP,CYAC), one of the authors (TL) re-  
92 reviewed all articles to add tags until a point of saturation was reached and no further topic tags could  
93 be added. Tags were then condensed into a core set of themes. These themes were assembled into a  
94 framework based on their frequency of occurrence, resulting in a map of the most published themes  
95 about physician suicide. Findings are summarized in narrative form.

### 96 **3 Results**

97 The 347 articles that met inclusion criteria (Figure 1) covered a broad range of publication types over  
98 time and from countries worldwide. The earliest publications were editorials (Table 1), with the first  
99 published in 1903 by an unknown author. Overall, 143 (41.2%) opinion articles were published,  
100 suggesting an ongoing public dialogue about physician suicide in academic journals lasting over a  
101 century. Of the remaining 204 (58.8%) articles, cross-sectional study design involving a survey was  
102 the most commonly used study design. Of these, 13 described interventions intended to prevent  
103 physician suicide. Such articles frequently introduced the paper by describing “a tragic case,” when  
104 the death of one or more physicians by suicide stimulates the development or implementation of an  
105 intervention (11).

106 Authors from 37 countries published articles on physician suicidal behaviors, including: the United  
107 States, United Kingdom, Finland, Norway, Sweden, Italy, Japan, Canada, China, Denmark, Hungary,  
108 Brazil, Egypt, Germany, Lebanon, Pakistan, Poland, Taiwan, Austria, Belgium, Bosnia and  
109 Herzegovina, India, Iran, Malaysia, Nepal, New Zealand, Portugal, Serbia, South Korea, Spain,

## Physician Suicide: A Scoping Review to Highlight Opportunities for Prevention

110 Thailand, Turkey and the United Arab Emirates. Some countries have only published opinion articles  
111 about the subject, including Israel, Nigeria, and Pakistan. Six articles were opinion articles that  
112 contained no information about country of origin.

### 113 3.1 Ascertaining Suicidal Behaviors

#### 114 3.1.1 Estimating Suicide Incidence

115 Death by suicide was the only primary topic in 108 (31.1%) of all articles. Non-opinion articles  
116 primarily sought to estimate epidemiology of suicidal behaviors among physician populations. In  
117 other words, death by suicide was most often studied among attending physicians because of  
118 availability of data on occupation and death, particularly in vital statistics or death certificates.  
119 However, the tools used to perform such estimates varied. Deaths by suicide were most frequently  
120 estimated based on 9<sup>th</sup> or 10<sup>th</sup> Revisions of the International Classification of Diseases (ICD-9 or  
121 ICD-10) codes on death certificates. Other commonly used sources of data included membership  
122 masterfiles from physician organizations or associations (12), published obituaries, and charts from  
123 medical records or forensic reports (Table 2). These data are primarily limited by potential  
124 undercoding. Undercoding can result from deaths being coded as accidental deaths, for example,  
125 leading to underestimation of the actual incidence of suicides among physicians. In an editorial, one  
126 author notes, “Suicide is a way to die and not a cause of death. And there are several means to this  
127 end: the ICD-10 lists at least 31 different ways to perform a suicide” (13). Rimpela et al articulated  
128 this in 1987 also: “Differentiation between suicide, accident, poisoning, and violence as a cause of  
129 death is often difficult, and suicide might sometimes be falsely, even deliberately, classified as an  
130 accident and even differently in different occupational groups” (14).

131 Suicides are typically reported as a *suicide mortality rate* (SMR) in epidemiologic literature, which is  
132 the number of deaths by suicide per 100,000 person-years. A *suicide rate ratio* can be calculated by  
133 dividing the SMR among physicians, or a subpopulation thereof, and dividing by a comparison  
134 group, such as the general population. Despite these standardized manners of suicide reporting,  
135 included papers showed inconsistencies in reporting, often reporting a *crude mortality rate*, which is  
136 calculated by the absolute number of physician suicides divided by the number of years in a study  
137 period, then reported per 100,000 physicians. For example, in 1968 Craig and Pitts counted 228  
138 suicides among physicians, based on obituary materials collected by the Deaths Editor of the *Journal*  
139 *of the American Medical Association*, between May 1965 and May 1967 (15). Combined with an  
140 estimation of approximately 296,000 physicians in the U.S. at the time, this resulted in a *crude*  
141 *annual suicide rate* of 38.4 per 100,000 physicians (15). Multiplying this crude annual suicide rate  
142 and the U.S. physician population of approximately 953,000, which was reported by a 2016 census  
143 from the Federation of State Medical Boards, leads to an estimate of 366 physician deaths by suicide  
144 annually.

145 Underreporting undermines the accuracy of physician suicide incidence estimates using death  
146 certificates, membership files, and medical charts. Surveys also can lead to underreporting. One study  
147 surveyed the deans of 116 medical schools in the 1970s about medical student suicides; 88  
148 respondents reported 52 medical student suicides between 1970 and 1978 (16). Another approach to  
149 studying physician suicides is psychological autopsy, in which a psychological profile about a person  
150 is constructed after their death. Time-intensive and not a standard practice, psychological autopsy  
151 involves collecting information through interviews of relatives and healthcare professionals, along  
152 with data from forensic examinations, police investigations, psychiatry, medical and social agency  
153 records, and any other information available, such as suicide notes (17). Such an approach can  
154 elucidate potential contributors to an individual’s death, providing detailed contextual information,

## Physician Suicide: A Scoping Review to Highlight Opportunities for Prevention

155 their life circumstances, and how they managed such circumstances up until their death. However,  
156 psychological autopsies are not systematically applied in the setting of deaths by suicide. Case  
157 reports also may describe a psychological profile, in addition to medical and clinical aspects of the  
158 case (10,17,18), but this was also infrequently published. In 2013, Gold et al examined data from the  
159 U.S. National Violent Death Reporting System (NVDRS), which is a combination of information and  
160 data from death certificates, coroner and medical examiner reports, toxicology reports, and law  
161 enforcement reports (2), the only study to triangulate multiple data sources to estimate suicide  
162 incidence. The wide variety of data sources and methods of estimation suggest that there is no  
163 standard.

### 164 3.1.2 Suicide Clusters

165 *Suicide clusters* are suicides that occur near each other, typically with respect to time and geography.  
166 *Suicide contagion* refers to spread of information about a suicide via media and other channels,  
167 which can increase suicide risk in a community. Only three studies acknowledged these topics. Two  
168 opinion papers described suicide clusters that occurred in a short time span and in a focused  
169 geographic region, one in Winnipeg, Canada (19) and another cited suicides in Australia that had  
170 been reported in news media (20). Both articles focused on intense or distressing working conditions  
171 as important factors in the suicide deaths but did not elaborate further on suicide clustering. In fact,  
172 the Canadian article, along with one other case series of physicians who died by suicide while on  
173 probation in Oregon state (21), used the term “epidemic” rather than “clusters.” Nonetheless, all three  
174 papers referred to the concepts of suicide clusters and suggest contagion, even though they do not use  
175 these terms explicitly. These were articles were tagged with the public health theme.

176 Suicide clusters also appeared to follow physician subpopulations, although numbers were small in  
177 such case series and opinion articles. Unexpected physician subpopulations included, for example,  
178 immigrant physicians (22), physician pilots (23), and physicians who experienced war either as  
179 victims or as wartime medics (24,25). In 2016, Bock et al describe a case series of 62 Hungarian  
180 Jewish dermatologists during the Holocaust: some emigrated, some died during Nazi rule, and others  
181 survived (24). Three of these dermatologists died by suicide, which was “very common among the  
182 doctors [under the Nazi ordeal], especially those physicians of the older generation” (24). Another  
183 unexpected analysis described the confusing ethical circumstances of physicians as terrorists (26).

### 184 3.1.3 Estimating Suicidal Ideation and Attempts

185 Overall, suicidal ideation was the second most studied thesis among articles included in this literature  
186 review, especially suicidal ideation among medical students. To assess suicidal ideation and attempts,  
187 surveys were most commonly used; overall, 61 cross-sectional survey studies were performed (Table  
188 1). Validated surveys are available to assess suicidal ideation (Table 2), however, investigator-  
189 developed items and surveys were also used. Only four studies compared physician subpopulations  
190 between countries. In the Health and Organization among University Hospital Physicians in Europe  
191 (HOUPE) study, investigators sought to compare suicidal thoughts and work-related stressors  
192 between practicing physicians in Italy and Sweden (27–29). Another study compared lifetime  
193 prevalence of suicidal thoughts among practicing physicians in Norway and Germany (30).

194 Suicide attempts in general were poorly studied in any physician subpopulation, but suicidal  
195 behaviors among postgraduate trainees were the least studied of all, with resident physicians’  
196 behaviors studied more than fellows. Among articles reviewed, only two validated tools, Paykel’s  
197 Instrument and the Beck Hopelessness Scale, were identified that were specifically designed to assess



## Physician Suicide: A Scoping Review to Highlight Opportunities for Prevention

198 suicide attempts; otherwise, investigators developed survey items to assess respondents' self-reported  
199 attempts.

### 200 3.2 Physician-specific Risk Factors

#### 201 3.2.1 Mental Health and Burnout

202 Physicians' risk factors for suicidal behaviors, especially mental health disorders, are among the most  
203 common topics of study. Gold et al examined NVDRS data and identified certain risks unique to  
204 physicians compared to non-physicians: physicians were more likely to have a job problem preceding  
205 death by suicide, and a greater likelihood of known mental health disorders, yet no accompanying  
206 increased likelihood of antidepressant therapy (2). Additional risk factors potentially include  
207 professional setbacks prior to suicide death, such as facing complaints (21,31), feeling overloaded,  
208 working long hours, or being unable to cope with job responsibilities (10), or experiencing disability  
209 as a result of medical illness (17,23,32). Related to these conditions, physicians are also at high risk  
210 of burnout, which has been found to be associated with suicidal ideation in U.S. medical students  
211 (33) and Dutch residents (34), although no direct relationship between burnout and death by suicide  
212 has been established. To assess these risk factors, a variety of validated questionnaires were used to  
213 inquire about general health, burnout and stress, mental health (e.g. depression, anxiety or insomnia),  
214 substance use including alcohol use, and other measures of career, work, personality, and other life  
215 experiences (Table 2). Additionally, investigator-developed survey questions were also used, for  
216 example, to assess attitudes towards suicidal behaviors of a peer.

217 Because the earliest publications about physician suicide suggested an increased incidence compared  
218 to the general population, certain theories have been applied to attempt to explain the increased  
219 suicide risk among physicians. For example, Fink-Miller applied the interpersonal psychological  
220 theory of suicidal behavior (IPT) (35,36) to physician suicide. The IPT posits three necessary and  
221 sufficient precursors to death by suicide: (1) *thwarted belongingness*, a feeling of disconnection with  
222 others, (2) *perceived burdensomeness*, a miscalculation that one's death would relieve burdens on  
223 others, and (3) *acquired capability*, habituation to previously provoked fear responses, including  
224 losing the fear of pain involved in taking one's life. This can stem from repeated exposure to painful  
225 or provocative stimuli, including events triggering second victimization, such as patients' poor  
226 outcomes, death, and suffering. This can then lead to desensitization when exposed to death in  
227 general. *Role strain* describes physician risks as a result of their direct work environment or  
228 professional norms; a mismatch between social and institutional norms and the physician's roles can  
229 manifest as an unrealistic expectation of perfect function at a maximum level of competence (37).  
230 Professional self-image and identity, along with self-stigma, are also considered relevant mediating  
231 themes (17,23,38).

232 Early studies of suicide rates by specialty suggested that psychiatry and anesthesiology had the  
233 highest suicide rates (35). Indeed, these two specialties occurred most frequently in this scoping  
234 literature review, followed by surgery or general surgery. However, the findings remain mixed due to  
235 data limitations in ascertaining suicide rates as noted previously (39–41). Furthermore, no  
236 explanations for the association have been offered other than a proffered but unstudied hypothesis  
237 that some medical specialties may possess more acquired capability than others (36,42).

#### 238 3.2.2 Specialized Knowledge and Access

239 The *access and knowledge hypothesis* is a commonly discussed risk factor for suicide death among  
240 physicians. Physicians acquire specialized medical knowledge of the human body and have access to  
241 the means (e.g. prescription drugs) that can cause lethal self-harm. Observational studies of means of

## Physician Suicide: A Scoping Review to Highlight Opportunities for Prevention

242 suicide death suggest that firearm, prescription drug overdose, and hanging are among the most  
243 common methods used by physicians (14,35,41), although this varies by country. Psychological  
244 autopsies are consistent with the access and knowledge hypothesis. One set of psychological  
245 autopsies in the United Kingdom examined 38 physician suicides, finding that 28 of the physicians  
246 died by self-poisoning and 11 by self-injury (other than poisoning), as one physician used both  
247 methods (10). In a Finnish psychological autopsy of 7 physician suicides, only 2 had previous suicide  
248 attempts, suggesting that physicians may be more likely to cause self-harm leading to death by  
249 suicide; in other words, physicians who die by suicide may not have had any prior suicide attempt,  
250 which is risk factor in the general population (17). Self-treatment or self-prescription is also a  
251 concerning contributor due to specialized access to controlled substances, as “medical doctors exploit  
252 their profession for purpose of self-treatment” (17).

### 253 3.2.3 Personality Traits, Upbringing, and Cultural Context

254 Personality and life experience prior to medical training might also contribute to physician suicide  
255 risk, although are poorly studied. In a prospective study of Norwegian medical students, the control  
256 personality trait, or the degree of compulsiveness, was independently linked to suicidal ideation; and  
257 more neuroticism, or the vulnerability personality trait, as a medical student independently predicted  
258 more serious suicidal ideations and planning in the first two postgraduate years (9,43,44). Reality  
259 weakness, more commonly associated with serious psychiatric pathology, predicted a transition from  
260 suicide ideation to planning (9). Neuroticism and tendency towards perfection may even be traits  
261 sought in potential medical trainees. One editorial speculates about the influence of adverse  
262 childhood experiences on risk for physician suicide (45). One South Korean study found a more than  
263 threefold risk of lifetime suicidal ideation, planning, and attempts among medical students who  
264 experienced emotional abuse early in life, characterized by “a continuously cold and uncaring  
265 parental attitude” (46). In China, medical students were surveyed about parental relationships and  
266 parenting communication styles, hypothesizing that this could be a highly influential aspect of the  
267 student’s character (47). The study found that for Chinese medical students, a good relationship with  
268 parents was statistically significantly associated with less suicidal ideation, plans and attempts.

269 Some studies sought to identify risk factors unique to their cultural context. Researchers in the United  
270 Arab Emirates collaborated with Eskin (48) to again assess medical students’ religiosity and their  
271 attitudes towards suicide (49). In this study, investigators suggested that the Islamic faith may serve  
272 as a protective factor against suicidal thoughts and death by suicide among their medical students. In  
273 Pakistan, a study of suicidal ideation among medical students included religion as a demographic  
274 characteristic but did not otherwise include religion in further analyses (50). Among opinion articles,  
275 certain conceptualizations of suicide also varied. For example, in one commentary from Japan, two  
276 concepts directly link overwork with death: *karoshi* (death due to overwork) and *karojisatsu* (suicide  
277 due to overwork) are considered causes of death in the Japanese culture (51) but nowhere else in the  
278 world.

### 279 3.2.4 Gender

280 Early studies in the 1970s and earlier explicitly excluded female and minority physicians (43,52,53).  
281 Results published in 1999 from the Women Physicians’ Health Study, which surveyed a sample of  
282 women physicians from the American Medical Association masterfile (54), described prior studies  
283 that reported an odds ratio as high as 4 for women physician suicides compared to other categories of  
284 women but that such studies were based on small numbers of suicide deaths. In 2004, Schernhammer  
285 performed a systematic review and meta-analysis, concluding that the suicide rate ratio for women  
286 physicians was 2.27 compared to the general women population, and 1.41 for male physicians

## Physician Suicide: A Scoping Review to Highlight Opportunities for Prevention

287 compared to the general male population (1). The 1999 study found that women physicians had  
288 similar rates of depression compared to the general population but had lower numbers of suicide  
289 attempts (54); the authors postulate that women physicians may have less suicidal intent or a higher  
290 rate of completion than the general population, although the study's scope did not include these  
291 outcomes. In 2013, a Polish study of perimenopausal female physicians examined sociodemographic  
292 and lifestyle variables' relationship to participants' subjective sense of health, including suicidal  
293 ideation. Eight of 221 participants reported suicidal thoughts, which was statistically significantly  
294 correlated with poorer subjective sense of health (55). Another study in Pakistan appeared to show no  
295 gender difference in terms of rates of suicidal ideation among medical students (56). Little data is  
296 known on suicide among physicians of gender minorities, as only one perspective piece written by a  
297 nurse who wrote about her transgender child who died by suicide (57).

### 298 3.3 Themes in Physician Suicide Literature

299 This scoping literature review revealed several themes in physician suicide literature, with greatest  
300 attention to identifying risk factors, such as mental health. Culture of practice and context of suicide,  
301 which include, for example, mental health stigma, physician attitudes towards suicide, and job  
302 conflicts, also were subjects of increased focus. These and the remaining themes identified are  
303 illustrated in Figure 2, where the most common themes are positioned at the broadest (top) level of an  
304 inverted pyramid. With each successive level of the inverted pyramid, fewer papers describe such  
305 issues. We chose an inverted pyramid to illustrate how the weight of the risk factors for physician  
306 suicides are balancing precariously over the vertex, where less attention on postvention and public  
307 health initiatives for surveillance and prevention. This imbalance quickly identifies potential areas for  
308 further work. Themes such as suicide as a public health issue, postvention, and legal issues were far  
309 less studied than others.

310 In the second level of the framework are epidemiologic and demographic focuses for study, which  
311 were previously described in section 3.2. Along with these subjects are a relatively lesser focus on  
312 substance use, compared to other risk factors such as mental health, and on developing educational  
313 curricula to address knowledge gaps about suicide and its prevention. Wellness is an increasingly  
314 popular topic for publication on this level of the framework. In the third level of the framework are  
315 prevention approaches. Thirteen articles described interventions with a primary aim of preventing  
316 physician suicides. Frequently, programs were implemented as an organizational response to a  
317 physician suicide. Five interventions implemented the AFSP's Interactive Screening Program for  
318 suicide prevention (58,59) as a component of a larger initiative to promote physician well-being;  
319 three of the five came from the same institution (60–62). Only one of 13 was a randomized controlled  
320 trial of a web-based screening program (63).

321 Treatments and responses to physician suicide were discussed as frequently as prevention; treatments  
322 and responses differed because treatments tended to focus on individual physician treatment for  
323 suicidal behaviors or related mental health disorders, and responses tended to focus on small group,  
324 physician health program, or medical board responses to individual circumstances. For example,  
325 Young et al described the difficult grieving process for a healthcare team after the death a physician  
326 (64). Patients were told that the physician who had died "was not available," trust between staff and  
327 administrators eroded, morale decreased, and grieving, guilt and other negative consequences  
328 remained unaddressed until six weeks after the physicians' death (64). The process of facilitating a  
329 normal grieving process after a suicide death has occurred requires active planning, called  
330 *postvention*. In another study by Kaltreider et al, 20 medical students were interviewed after the death  
331 of a classmate by suicide (65). This qualitative study found that students experienced intense,



## Physician Suicide: A Scoping Review to Highlight Opportunities for Prevention

332 intrusive, and persistent thoughts and emotions relating to their classmate's death, sometimes lasting  
333 for months. Proximity to the site of the death, prior exposure to another suicide previously, or  
334 familiarity with depression in themselves or family seemed to increase these effects.

335 Legal and policy issues are increasingly recognized as affecting physician health and well-being, and  
336 appear in the third and fourth levels of Figure 2. Physicians may avoid seeking mental health  
337 treatment, avoid self-report, and self-treat mental health and other health issues (66,67), out of fear of  
338 reputational damage or concern about perceived weakness or impairment (68). Licensure application  
339 questions could be improved (68) and compassionate, confidential assistance programs, such as one  
340 implemented in the United Kingdom in 2010, could offer bespoke services to physicians who might  
341 be considered at risk of suicide (67). In 2015, the UK's General Medical Council was recommended  
342 to fund a pilot program that would include developing a national support service for doctors (69).  
343 However, no literature was found to describe such policies in other countries.

344 Only three articles describe suicide clustering and suicide contagion, which are unique public health  
345 concepts pertaining to suicide (19–21). However, no further follow-up or other literature regarding  
346 these suicide clusters were found in this scoping review. As a result, the themes of postvention and  
347 public health approaches to physician suicide both were at the vertex (bottom) of the inverted  
348 pyramid.

### 349 **4 Discussion**

350 As a scoping literature review, this review did not include a quality assessment of quantitative  
351 evidence from included papers nor did it perform a meta-analysis or any statistical comparisons of  
352 published evidence, which would be characteristic of a systematic review (6). More papers on  
353 physician suicide have been published over the last two decades than before. This follows an overall  
354 trend in published literature on physician well-being and may also reflect growing public recognition  
355 of and decreasing stigma relating to suicide. Furthermore, the proportion of opinion articles  
356 published is lower in the recent past compared to previously, indicating growing application of  
357 contemporary statistical and scientific methods to the study of physician suicide. Nonetheless, themes  
358 identified reveal opportunities for further work. The inverted pyramid framework (Figure 2) suggests  
359 that there is a dearth of work on examining physician suicide using typical public health approaches  
360 to investigate suicide clusters.

361 Figure 3 offers a proposed framework that highlights priorities for continued work on physician  
362 suicide. This framework highlights the potential for developing an organized public health approach  
363 to preventing physician suicide. The pyramid's base identifies areas for immediate, targeted actions,  
364 forming the foundation for the following recommendations for action:

- 365 • Mandatory reporting, an approach used for workplace injury reporting, which could  
366 improve surveillance of physician deaths by suicide (prevention);
- 367 • Identification of minimum acceptable community standards of validated instruments  
368 to assess suicidal ideation and attempts (prevention, public health);
- 369 • Development and implementation of evidence-based screening and service provision  
370 for suicide risk factors (58–63) (prevention);
- 371 • Development of early warning systems, like those used to monitor infectious disease  
372 outbreaks, to signal suicide clusters and contagion (public health);
- 373 • Implementation and dissemination of best practices, especially regarding postvention or  
374 additional directed interventions (postvention);

## Physician Suicide: A Scoping Review to Highlight Opportunities for Prevention

- 375                   • Increase education in the healthcare community about suicide warning signs and  
376                   prevention (education, wellness);  
377                   • Standardized education in the medical community about appropriate reporting on  
378                   suicides to prevent suicide contagion (education);  
379                   • Reduction of barriers to help-seeking behavior, reduce systematic stigma in licensing  
380                   and investigative processes (policy issues, legal issues).

381 Higher levels in Figure 3 include continued study of persistent risk factors, contextual and cultural  
382 challenges, social factors like family, and health inequities resulting from gender, immigrant, or other  
383 minority status, among other concerns. Currently available information is insufficient to draw  
384 conclusions about physician subgroups or their cultural or health system contexts. Such information  
385 on understudied physician subgroups could better inform future revisions of public health,  
386 prevention, and postvention programs to include diversity-sensitive suicide prevention approaches.

387 The strengths of this scoping literature review are its breadth and inclusiveness in examining multiple  
388 types of published literature in scholarly journals. However, due to the volume of citations generated  
389 by the searches, we excluded grey literature (e.g. conference proceedings, poster presentations, etc.)  
390 and snowballing of references was not performed. Additionally, physician suicide involves multiple  
391 disciplines, and searching additional electronic databases of peer-reviewed and non-peer-reviewed  
392 literature may be appropriate for future updates of such a literature review. Finally, additional articles  
393 have been published on physician suicide since the end of the search period of April 2018. Excluding  
394 non-English language publications may have led to overrepresentation of countries where English is  
395 the official language. Among the 46 non-English language papers excluded (Figure 1), potentially  
396 relevant papers were published in German, Spanish, Dutch, Finnish, Japanese, Chinese, French,  
397 Swedish, and Hungarian, which could reveal relevant themes in physician suicide, including cultural  
398 or health system context. Future studies could identify opportunities for cross-disciplinary and cross-  
399 cultural learning and suicide prevention.

## 400 **5 Conclusion**

401 This scoping review offers a landscape view of physician suicide literature and opportunities for  
402 further work on physician suicide prevention. Interventions are needed at multiple levels to mitigate  
403 the risks of physician suicide, which could begin with an organized public health approach. As a part  
404 of such an approach, consistency and reliability of data and information about physician suicides  
405 could be improved. Data limitations partly contribute to these issues. For example, annual rates of  
406 physician suicide reported and quoted may result from extrapolated estimates from old data, such as  
407 those collected by Craig and Pitts in 1968 (15). Reliable and trackable data and information can  
408 provide more continuously updated insights into actual suicide mortality rate ratios of physician  
409 suicide compared to other populations (70). Also, systems could be developed to better monitor  
410 physician suicides, offer early warnings of possible suicide clusters or contagion, and may improve  
411 investigation and interventions for the benefit of physicians' and public health. Physician suicide  
412 should be approached as a public health issue and as a shared responsibility between individuals and  
413 institutions to prevent physician deaths by suicide.

## 414 **6 Author Contributions**

415 TIL, SP, and CYAC designed the study and performed study selection. RS performed the literature  
416 search. TIL and SP extracted data, TIL performed computational analyses, and TIL, SP, and CYAC  
417 interpreted the data. TIL drafted the manuscript, except for the Methods section which was drafted by

## Physician Suicide: A Scoping Review to Highlight Opportunities for Prevention

418 RS, and the entire manuscript was produced with critical revisions and important intellectual content  
419 from all authors.

### 420 **7 Acknowledgments**

421 The authors wish to acknowledge Dr. Christine Moutier and Dr. Srijan Sen for their critical review  
422 and feedback on the manuscript, as well as Dr. Matthew Goldberg for his early contributions to the  
423 background and initial design considerations for this review.

### 424 **8 References**

- 425 1. Schernhammer ES, Colditz GA. Suicide rates among physicians: a quantitative and gender  
426 assessment (meta-analysis). *Am J Psychiatry* [Internet]. 2004 Dec;161(12):2295–302.  
427 Available from: <http://www.ncbi.nlm.nih.gov/pubmed/15569903>
- 428 2. Gold KJ, Sen A, Schwenk TL. Details on suicide among US physicians: data from the  
429 National Violent Death Reporting System. *Gen Hosp Psychiatry* [Internet]. 2013  
430 Jan;35(1):45–9. Available from:  
431 <http://linkinghub.elsevier.com/retrieve/pii/S016383431200268X>
- 432 3. Peterson C, Stone DM, Marsh SM, Schumacher PK, Tiesman HM, McIntosh WL, et al.  
433 Suicide Rates by Major Occupational Group — 17 States, 2012 and 2015. *MMWR Morb*  
434 *Mortal Wkly Rep* [Internet]. 2018 Nov 16 [cited 2019 Jul 3];67(45):1253–60. Available from:  
435 [http://www.cdc.gov/mmwr/volumes/67/wr/mm6745a1.htm?s\\_cid=mm6745a1\\_w](http://www.cdc.gov/mmwr/volumes/67/wr/mm6745a1.htm?s_cid=mm6745a1_w)
- 436 4. Arksey H, O'Malley L. Scoping studies: towards a methodological framework. *Int J Soc Res*  
437 *Methodol* [Internet]. 2005 Feb [cited 2018 Aug 29];8(1):19–32. Available from:  
438 <http://www.tandfonline.com/doi/abs/10.1080/1364557032000119616>
- 439 5. Peters MDJ, Godfrey CM, Khalil H, McInerney P, Parker D, Soares CB. Guidance for  
440 conducting systematic scoping reviews. *Int J Evid Based Healthc* [Internet]. 2015  
441 Sep;13(3):141–6. Available from:  
442 <http://content.wkhealth.com/linkback/openurl?sid=WKPTLP:landingpage&an=01787381->  
443 [201509000-00005](http://content.wkhealth.com/linkback/openurl?sid=WKPTLP:landingpage&an=01787381-201509000-00005)
- 444 6. The Joanna Briggs Institute. Joanna Briggs Institute Reviewers' Manual 2015: Methodology  
445 for JBI Scoping Reviews [Internet]. Adelaide, South Australia; 2015. Available from:  
446 [http://joannabriggs.org/assets/docs/sumari/Reviewers-Manual\\_Methodology-for-JBI-Scoping-](http://joannabriggs.org/assets/docs/sumari/Reviewers-Manual_Methodology-for-JBI-Scoping-)  
447 [Reviews\\_2015\\_v2.pdf](http://joannabriggs.org/assets/docs/sumari/Reviewers-Manual_Methodology-for-JBI-Scoping-Reviews_2015_v2.pdf)
- 448 7. Hem E, Grønvold NT, Aasland OG, Ekeberg Ø. The prevalence of suicidal ideation and  
449 suicidal attempts among Norwegian physicians. Results from a cross-sectional survey of a  
450 nationwide sample. *Eur Psychiatry* [Internet]. 2000 May;15(3):183–9. Available from:  
451 <http://linkinghub.elsevier.com/retrieve/pii/S0924933800002273>
- 452 8. Aasland OG, Ekeberg Ø, Schweder T. Suicide rates from 1960 to 1989 in Norwegian  
453 physicians compared with other educational groups. *Soc Sci Med* [Internet]. 2001  
454 Jan;52(2):259–65. Available from:  
455 <http://linkinghub.elsevier.com/retrieve/pii/S0277953600002264>

## Physician Suicide: A Scoping Review to Highlight Opportunities for Prevention

- 456 9. Tyssen R, Hem E, Vaglum P, Grønvold NT, Ekeberg Ø. The process of suicidal planning  
457 among medical doctors: predictors in a longitudinal Norwegian sample. *J Affect Disord*  
458 [Internet]. 2004 Jun;80(2–3):191–8. Available from:  
459 <http://linkinghub.elsevier.com/retrieve/pii/S0165032703000910>
- 460 10. Hawton K, Malmberg A, Simkin S. Suicide in doctors: A psychological autopsy study. *J*  
461 *Psychosom Res*. 2004;57(1):1–4.
- 462 11. Shanafelt T, Trockel M, Ripp J, Murphy M Lou, Sandborg C, Bohman B. Building a Program  
463 on Well-Being: Key Design Considerations to Meet the Unique Needs of Each Organization.  
464 *Acad Med* [Internet]. 2019 Feb;94(2):156–61. Available from:  
465 <http://insights.ovid.com/crossref?an=00001888-900000000-97829>
- 466 12. Juel K, Mosbech J, Hansen ES. Mortality and causes of death among Danish medical doctors  
467 1973-1992. *Int J Epidemiol*. 1999;28(3):456–60.
- 468 13. Aasland OG. Physician suicide-why? *Gen Hosp Psychiatry*. 2013;35(1):1–2.
- 469 14. Rimpelä AH, Pulkkinen PO, Nurminen MM, Rimpelä MK, Valkonen T. Mortality of Doctors:  
470 Do Doctors Benefit From Their Medical Knowledge? *Lancet*. 1987;329(8524):84–6.
- 471 15. Craig AG, Pitts FN. Suicide by physicians. *Dis Nerv Syst* [Internet]. 1968 Nov;29(11):763–72.  
472 Available from: <http://www.ncbi.nlm.nih.gov/pubmed/5717292>
- 473 16. Pepitone-Arreola-Rockwell F, Rockwell D, Core N. Fifty-two medical student suicides. *Am J*  
474 *Psychiatry* [Internet]. 1981 Feb;138(2):198–201. Available from:  
475 <http://psychiatryonline.org/doi/abs/10.1176/ajp.138.2.198>
- 476 17. Lindeman S, Heinänen H, Väisänen E, Lönnqvist J. Suicide among medical doctors:  
477 Psychological autopsy data on seven cases. *Arch Suicide Res*. 1998;4(2):135–41.
- 478 18. Koekkoek B, Gunderson JG, Kaasenbrood A, Gutheil TG. Chronic suicidality in a physician:  
479 An alliance yet to become therapeutic. *Harv Rev Psychiatry*. 2008;16(3):195–204.
- 480 19. Williams LS. Manitoba suicides force consideration of stresses facing medical residents.  
481 *CMAJ* [Internet]. 1997 Jun 1;156(11):1599–602. Available from:  
482 <http://www.ncbi.nlm.nih.gov/pubmed/9176428>
- 483 20. Clarke R, McKee M. Suicides among junior doctors in the NHS. *BMJ*. 2017;357:1–2.
- 484 21. Crawshaw R, Bruce JA, Eraker PL, Greenbaum M, Lindemann JE, Schmidt DE. An epidemic  
485 of suicide among physicians on probation. *JAMA* [Internet]. 1980 May 16;243(19):1915–7.  
486 Available from: <http://www.ncbi.nlm.nih.gov/pubmed/7365972>
- 487 22. Richings JC, Khara GS, McDowell M. Suicide in young doctors. *Br J Psychiatry* [Internet].  
488 1986 Oct;149:475–8. Available from: <http://www.ncbi.nlm.nih.gov/pubmed/3814932>
- 489 23. Cath SH. Some Human Factors in the Flying Physician. *Aerosp Med*. 1974;45(11):1298–302.
- 490 24. Bock J, Burgdorf WHC, Hoenig LJ, Parish LC. The fate of Hungarian Jewish dermatologists  
491 during the Holocaust: Part 2: Under Nazi rule. *Clin Dermatol* [Internet]. 2016;34(6):768–78.



## Physician Suicide: A Scoping Review to Highlight Opportunities for Prevention

- 492 Available from: <http://dx.doi.org/10.1016/j.clindermatol.2016.06.002>
- 493 25. Likeman RK. Physician, heal thyself. *Med J Aust* [Internet]. 2015 Apr 20;202(7):383.  
494 Available from: <https://www.mja.com.au/journal/2015/202/7/physician-heal-thyself>
- 495 26. Marvasti JA, Vahidy A. How Healers Become Killers: Physicians as Suicide Bombers. *Am J*  
496 *Forensic Psychaitry*. 2008;29(4):39–55.
- 497 27. Fridner A, Belkic K, Marini M, Minucci D, Pavan L, Schenck-Gustafsson K. Survey on recent  
498 suicidal ideation among female university hospital physicians in Sweden and Italy (the  
499 HOUPE study): Cross-sectional associations with work stressors. *Gend Med* [Internet].  
500 2009;6(1):314–28. Available from: <http://dx.doi.org/10.1016/j.genm.2009.04.006>
- 501 28. Fridner A, Belkić K, Minucci D, Pavan L, Marini M, Pingel B, et al. Work environment and  
502 recent suicidal thoughts among male university hospital physicians in Sweden and Italy: The  
503 Health and Organization among University Hospital Physicians in Europe (HOUPE) study.  
504 *Gend Med*. 2011;8(4):269–79.
- 505 29. Fridner A, Belkić K, Marini M, Sendén MG, Schenck-Gustafsson K. Why don't academic  
506 physicians seek needed professional help for psychological distress? *Swiss Med Wkly*.  
507 2012;142(JULY):1–8.
- 508 30. Rosta J, Aasland OG. Changes in the lifetime prevalence of suicidal feelings and thoughts  
509 among Norwegian doctors from 2000 to 2010: A longitudinal study based on national samples.  
510 *BMC Psychiatry*. 2013;13(1):1–10.
- 511 31. Casey D, Choong KA. Suicide whilst under GMC's fitness to practise investigation: Were  
512 those deaths preventable? *J Forensic Leg Med* [Internet]. 2016;37:22–7. Available from:  
513 <http://dx.doi.org/10.1016/j.jflm.2015.10.002>
- 514 32. Thomas JC. Re-Visioning Medicine. *J Med Humanit*. 2014;35(4):405–22.
- 515 33. Dyrbye LN, Thomas MR, Massie FS, Power D V, Eacker A, Harper W, et al. Burnout and  
516 suicidal ideation among U.S. medical students. *Ann Intern Med* [Internet]. 2008 Sep  
517 2;149(5):334–41. Available from:  
518 <http://www.councilscienceeditors.org/i4a/pages/index.cfm?pageid=3410>
- 519 34. Van Der Heijden F, Dillingh G, Bakker A, Prins J. Suicidal thoughts among medical residents  
520 with burnout. *Arch Suicide Res*. 2008;12(4):344–6.
- 521 35. Cornette MM, Deroon-Cassini TA, Fosco GM, Holloway RL, Clark DC, Joiner TE.  
522 Application of an interpersonal-psychological model of suicidal behavior to physicians and  
523 medical trainees. *Arch Suicide Res*. 2009;13(1):1–14.
- 524 36. Fink-Miller EL. An Examination of the Interpersonal Psychological Theory of Suicidal  
525 Behavior in Physicians. *Suicide Life-Threatening Behav*. 2015;45(4):488–94.
- 526 37. DeSole DE, Singer P, Aronson S. Suicide and Role Strain Among Physicians. *Int J Soc*  
527 *Psychiatry*. 1969;15(4):294–301.

## Physician Suicide: A Scoping Review to Highlight Opportunities for Prevention

- 528 38. Legha RK. A History of Physician Suicide in America. *J Med Humanit.* 2012;33(4):219–44.
- 529 39. Bruce DL, Eide KA, Linde HW, Eckenhoff JE. Causes of Death among Anesthesiologists: A  
530 20-Year Survey. *Anesthesiology.* 1968;29(3):565–9.
- 531 40. Neil HAW, Fairer JG, Coleman MP, Thurston A, Vessey MP. Mortality among male  
532 anaesthetists in the United Kingdom, 1957-83. *BMJ [Internet].* 1987 Aug 8;295(6594):360–2.  
533 Available from: <http://www.bmj.com/cgi/doi/10.1136/bmj.295.6594.360>
- 534 41. Swanson SP, Roberts LJ, Chapman MD. Are anaesthetists prone to suicide? A review of rates  
535 and risk factors. *Anaesth Intensive Care [Internet].* 2003 Aug;31(4):434–45. Available from:  
536 <http://www.ncbi.nlm.nih.gov/pubmed/12973968>
- 537 42. Fink-Miller EL. Provocative work experiences predict the acquired capability for suicide in  
538 physicians. *Psychiatry Res [Internet].* 2015;229(1–2):143–7. Available from:  
539 <http://dx.doi.org/10.1016/j.psychres.2015.07.055>
- 540 43. Graves PL, Thomas CB. Habits of Nervous Tension and Suicide. *Suicide Life-Threatening  
541 Behav.* 1991;21(2):91–105.
- 542 44. Tyssen R, Vaglum P, Grønvold NT, Ekeberg Ø. Suicidal ideation among medical students and  
543 young physicians: a nationwide and prospective study of prevalence and predictors. *J Affect  
544 Disord.* 2001;64(1):69–79.
- 545 45. Johnson WDK. Predisposition to emotional distress and psychiatric illness amongst doctors:  
546 The role of unconscious and experiential factors. *Br J Med Psychol.* 1991;64(4):317–29.
- 547 46. Jeon HJ, Roh MS, Kim KH, Lee JR, Lee D, Yoon SC, et al. Early trauma and lifetime suicidal  
548 behavior in a nationwide sample of Korean medical students. *J Affect Disord [Internet].*  
549 2009;119(1–3):210–4. Available from: <http://dx.doi.org/10.1016/j.jad.2009.03.002>
- 550 47. Sun L, Zhou C, Xu L, Li S, Kong F, Chu J. Suicidal ideation, plans and attempts among  
551 medical college students in china: The effect of their parental characteristics. *Psychiatry Res  
552 [Internet].* 2017;247(April 2016):139–43. Available from:  
553 <http://dx.doi.org/10.1016/j.psychres.2016.11.024>
- 554 48. Eskin M, Voracek M, Stieger S, Altinyazar V. A cross-cultural investigation of suicidal  
555 behavior and attitudes in Austrian and Turkish medical students. *Soc Psychiatry Psychiatr  
556 Epidemiol.* 2011;46(9):813–23.
- 557 49. Amiri L, Voracek M, Yousef S, Galadari A, Yammahi S, Sadeghi MR, et al. Suicidal behavior  
558 and attitudes among medical students in the United Arab Emirates. *Crisis.* 2013;34(2):116–23.
- 559 50. Osama M, Islam MY, Hussain SA, Masroor SMZ, Burney MU, Masood MA, et al. Suicidal  
560 ideation among medical students of Pakistan: A cross-sectional study. *J Forensic Leg Med  
561 [Internet].* 2014;27:65–8. Available from: <http://dx.doi.org/10.1016/j.jflm.2014.08.006>
- 562 51. Hiyama T, Yoshihara M. New occupational threats to Japanese physicians: karoshi (death due  
563 to overwork) and karojisatsu (suicide due to overwork). *Occup Environ Med [Internet].* 2008  
564 Jun;65(6):428–9. Available from: <http://www.ncbi.nlm.nih.gov/pubmed/18487428>

## Physician Suicide: A Scoping Review to Highlight Opportunities for Prevention

- 565 52. Thomas CB, Greenstreet RL. Psychobiological characteristics in youth as predictors of five  
566 disease states: suicide, mental illness, hypertension, coronary heart disease and tumor. *Johns*  
567 *Hopkins Med J*. 1973;132(1):16–43.
- 568 53. Ullmann D, Phillipst RL, Beeson WL, Dewey HG, Brin BN, Kuzma JW, et al. Cause-Specific  
569 Mortality Among Physicians With Differing Life-styles. *JAMA J Am Med Assoc*.  
570 1991;265(18):2352–9.
- 571 54. Frank E, Dingle AD. Self-reported depression and suicide attempts among U.S. women  
572 physicians. *Am J Psychiatry* [Internet]. 1999 Dec;156(12):1887–94. Available from:  
573 <http://www.ncbi.nlm.nih.gov/pubmed/10588401>
- 574 55. Gojdz K, Ba□k-Sosnowska M, Kołodziej S, Skrzypulec-Plinta V. Quality of life of female  
575 physicians aged 45-55 years. *Prz Menopauzalny*. 2013;17(3):213–5.
- 576 56. Ghazanfar H, Hameed S, Ghazanfar A, Bhatti JRA, Haq I ul, Saeed R, et al. Suicidal ideation  
577 among Pakistani medical students. *Rawal Med J*. 2015;40(4):458–62.
- 578 57. Dippo J. A Mother’s Story. *Minn Med*. 2007;(December):28–31.
- 579 58. Ey S, Moffit M, Kinzie JM, Brunett PH. Feasibility of a Comprehensive Wellness and Suicide  
580 Prevention Program: A Decade of Caring for Physicians in Training and Practice. *J Grad Med*  
581 *Educ* [Internet]. 2016;8(5):747–53. Available from: [http://www.jgme.org/doi/10.4300/JGME-](http://www.jgme.org/doi/10.4300/JGME-D-16-00034.1)  
582 [D-16-00034.1](http://www.jgme.org/doi/10.4300/JGME-D-16-00034.1)
- 583 59. Haskins J, Carson JG, Chang CH, Kirshnit C, Link DP, Navarra L, et al. The Suicide  
584 Prevention, Depression Awareness, and Clinical Engagement Program for Faculty and  
585 Residents at the University of California, Davis Health System. *Acad Psychiatry* [Internet].  
586 2016 Feb 11;40(1):23–9. Available from: <http://link.springer.com/10.1007/s40596-015-0359-0>
- 587 60. Moutier C, Norcross W, Jong P, Norman M, Kirby B, McGuire T, et al. The Suicide  
588 Prevention and Depression Awareness Program at the University of California, San Diego  
589 School of Medicine. *Acad Med* [Internet]. 2012 Mar;87(3):320–6. Available from:  
590 <https://insights.ovid.com/crossref?an=00001888-201203010-00018>
- 591 61. Downs N, Feng W, Kirby B, McGuire T, Moutier C, Norcross W, et al. Listening to  
592 Depression and Suicide Risk in Medical Students: the Healer Education Assessment and  
593 Referral (HEAR) Program. *Acad Psychiatry* [Internet]. 2014 Oct 5;38(5):547–53. Available  
594 from: <http://link.springer.com/10.1007/s40596-014-0115-x>
- 595 62. Zisook S, Young I, Doran N, Downs N, Hadley A, Kirby B, et al. Suicidal Ideation among  
596 Students and Physicians at a U.S. Medical School: A Healer Education, Assessment and  
597 Referral (HEAR) Program Report. *Omega - J Death Dying*. 2016;74(1):35–61.
- 598 63. Guille C, Zhao Z, Krystal J, Nichols B, Brady K, Sen S. Web-based cognitive behavioral  
599 therapy intervention for the prevention of suicidal ideation in medical interns a randomized  
600 clinical trial. *JAMA Psychiatry*. 2015;72(12):1192–8.
- 601 64. Young JJ, Ursano RJ, Bally RE, McNeil DS. Consultation to a clinic following suicide. *Am J*  
602 *Orthopsychiatry* [Internet]. 1989 Jul;59(3):473–6. Available from:

## Physician Suicide: A Scoping Review to Highlight Opportunities for Prevention

- 603 <http://www.ncbi.nlm.nih.gov/pubmed/2764080>
- 604 65. Kaltreider NB. The impact of a medical student's suicide. *Suicide Life Threat Behav*  
605 [Internet]. 1990;20(3):195–205. Available from:  
606 <http://www.ncbi.nlm.nih.gov/pubmed/2238012>
- 607 66. Johnston GP. Dangers of Self-Prescription. *J Indiana State Med Assoc.* 1979;72(8):570–2.
- 608 67. Feeney S, O'Brien K, O'Keeffe N, Iomaire ANC, Kelly ME, McCormack J, et al. Practise  
609 what you preach: Health behaviours and stress among non-consultant hospital doctors. *Clin*  
610 *Med J R Coll Physicians London.* 2016;16(1):12–8.
- 611 68. Worley LLM. Our Fallen Peers: A Mandate for Change. *Acad Psychiatry* [Internet]. 2008 Feb  
612 1;32(1):8–12. Available from: <http://link.springer.com/10.1176/appi.ap.32.1.8>
- 613 69. Meerten M, Bland J, Gross SR, Garelick AI. Doctors' experience of a bespoke physician  
614 consultation service: cross-sectional investigation. *Psychiatrist* [Internet]. 2011;35(06):206–12.  
615 Available from:  
616 [https://www.cambridge.org/core/product/identifier/S1758320900007137/type/journal\\_article](https://www.cambridge.org/core/product/identifier/S1758320900007137/type/journal_article)
- 617 70. Leung TI, Pendharkar S, Chen C-YA, Dumontier M. Finding the evidence base using citation  
618 networks: Do 300 to 400 U.S. physicians die by suicide annually? In: *AMIA Symposium*  
619 *Proceedings.* Washington, DC; 2019.



**Fig. 1** PRISMA diagram of study selection for inclusion

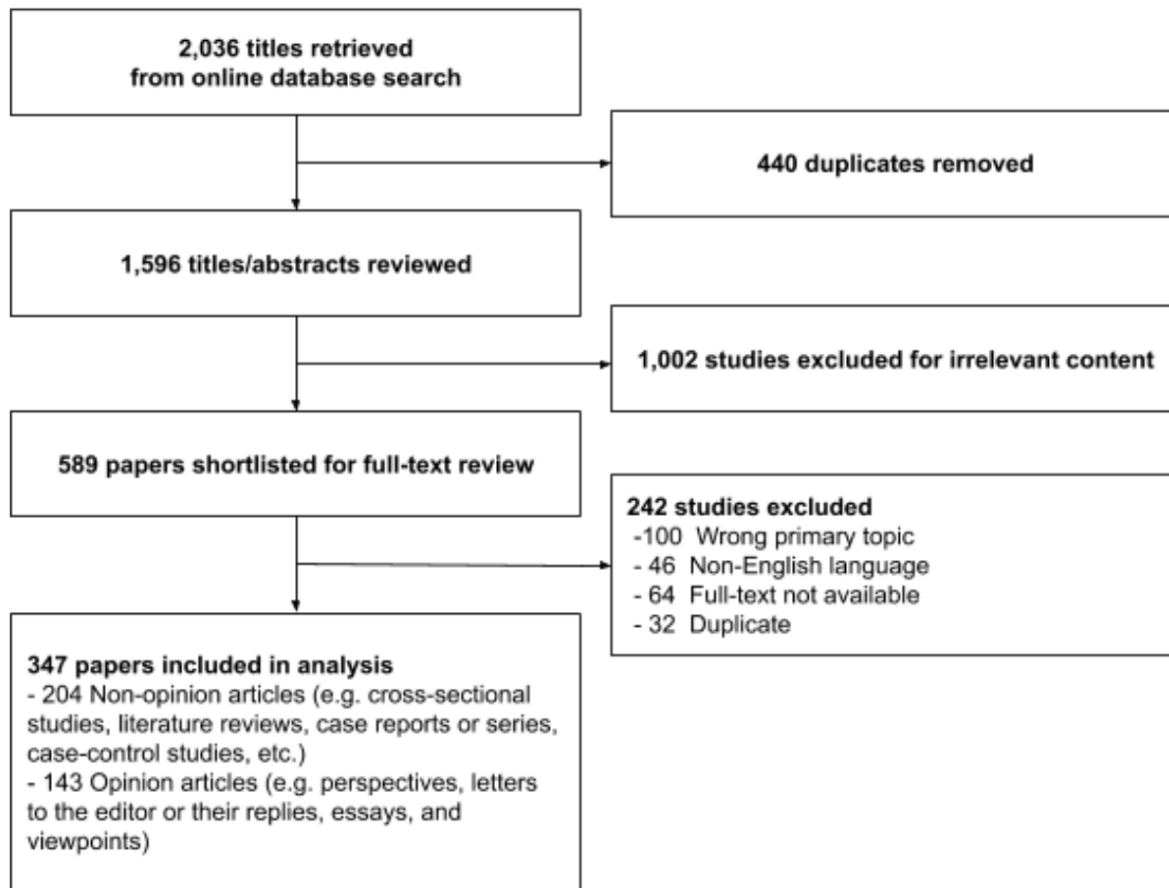

**Table 1.** Article characteristics from scoping review of literature on physician suicide, 1903-2018

| <b>Publication date range</b> | <b>No. (%) of non-opinion articles</b> | <b>No. (%) of opinion articles</b> |
|-------------------------------|----------------------------------------|------------------------------------|
| 1900-1919                     | 0                                      | 1 (0.7%)                           |
| 1920-1949                     | 0                                      | 1 (0.7%)                           |
| 1950-1959                     | 0                                      | 0                                  |
| 1960-1969                     | 5 (2.4%)                               | 9 (6.3%)                           |
| 1970-1979                     | 24 (11.7%)                             | 19 (13.3%)                         |
| 1980-1989                     | 20 (9.8%)                              | 18 (12.7%)                         |
| 1990-1999                     | 26 (12.7%)                             | 14 (9.9%)                          |
| 2000-2009                     | 42 (20.5%)                             | 37 (26.1%)                         |
| 2010-2018                     | 88 (42.9%)                             | 43 (30.3%)                         |

  

| <b>Study design or publication type</b> | <b>No. (%) of non-opinion articles</b> | <b>No. (%) of opinion articles</b> |
|-----------------------------------------|----------------------------------------|------------------------------------|
| Cross-sectional studies                 | 85 (41.5%)                             | N/A                                |
| Survey-based                            | 63                                     |                                    |
| Review                                  | 34 (16.6%)                             |                                    |
| Narrative                               | 30                                     |                                    |
| Case report or case series              | 22 (10.7%)                             |                                    |
| Case-control                            | 19 (9.3%)                              |                                    |
| Cohort studies                          | 14 (6.8%)                              |                                    |
| Intervention†                           | 13 (6.3%)                              |                                    |
| Other††                                 | 18 (8.8%)                              |                                    |

†Publications about an intervention at minimum describe the intervention.

††Other study designs included: qualitative studies or psychological autopsy (n=8), validation or evaluation of a survey instrument or screening question (3), news coverage (4), poetry (1), a discussion guide (1), or a correction (1).

**Table 2** Methods of ascertainment of suicidal behaviors and related risk factors, for 204 non-opinion publications

---

**Methods of ascertainment**

---

**Suicide death**

Death certificates (vital statistics by U.S. state or non-U.S. country)  
Forensic, pathology, or autopsy reports, e.g. from a medical examiner's office  
Medical chart reviews of physician patients  
Professional membership masterfiles  
Obituaries published in journals (e.g. *JAMA*)  
Family confirmation or interviews

**Suicide attempt**

Paykel's Instrument (assesses suicidal ideation and suicide attempts)  
Beck Hopelessness Scale  
Investigator-developed question(s) or questionnaire

**Suicidal thoughts or ideation**

Patient Health Questionnaire 9  
Beck Scale for Suicidal Ideation  
Acquired Capability for Suicide Scale  
Self-harm Behavior Questionnaire  
Suicidal Behaviors Questionnaire  
Investigator-developed question(s) or questionnaire

---

**Fig. 2** Framework of common publication themes on physician suicide

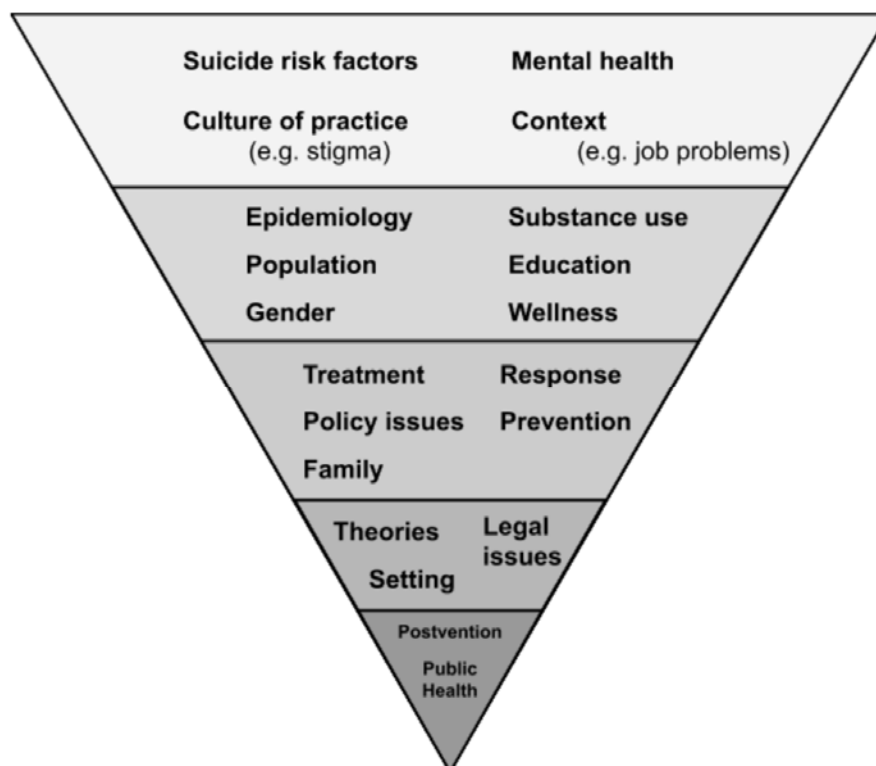



**Fig. 3** Proposed framework to highlight foundational priorities for continued work on physician suicide

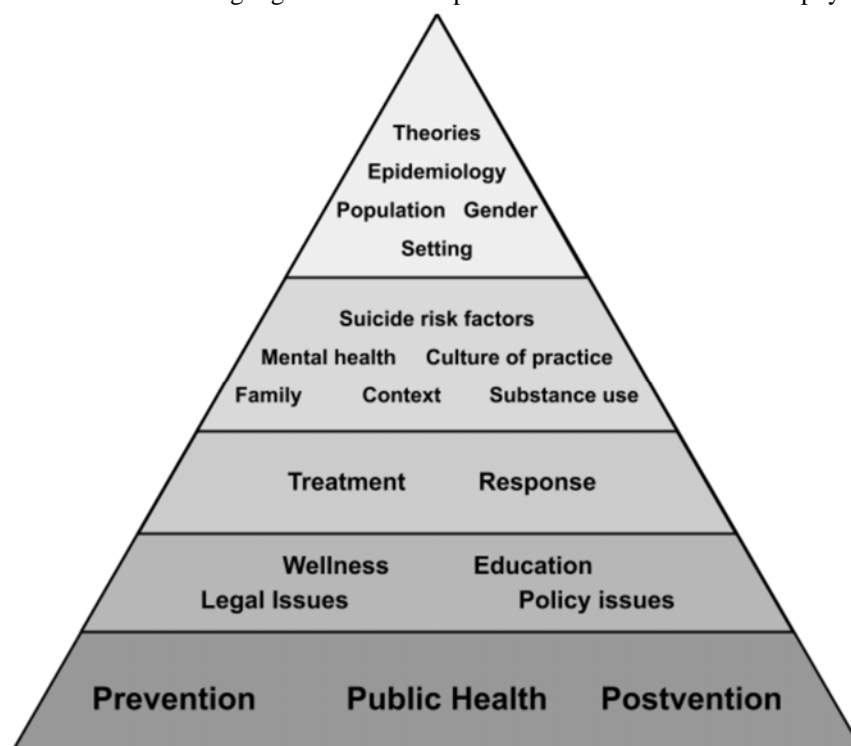

Source: https://www.medrxiv.org/content/10.1101/19004465v1.full.pdf
